# Supplementary material
Source: PubMed Central journal article supplement (PMC7191224)

Topoplots of the corrected TEP of P001 (Avref)

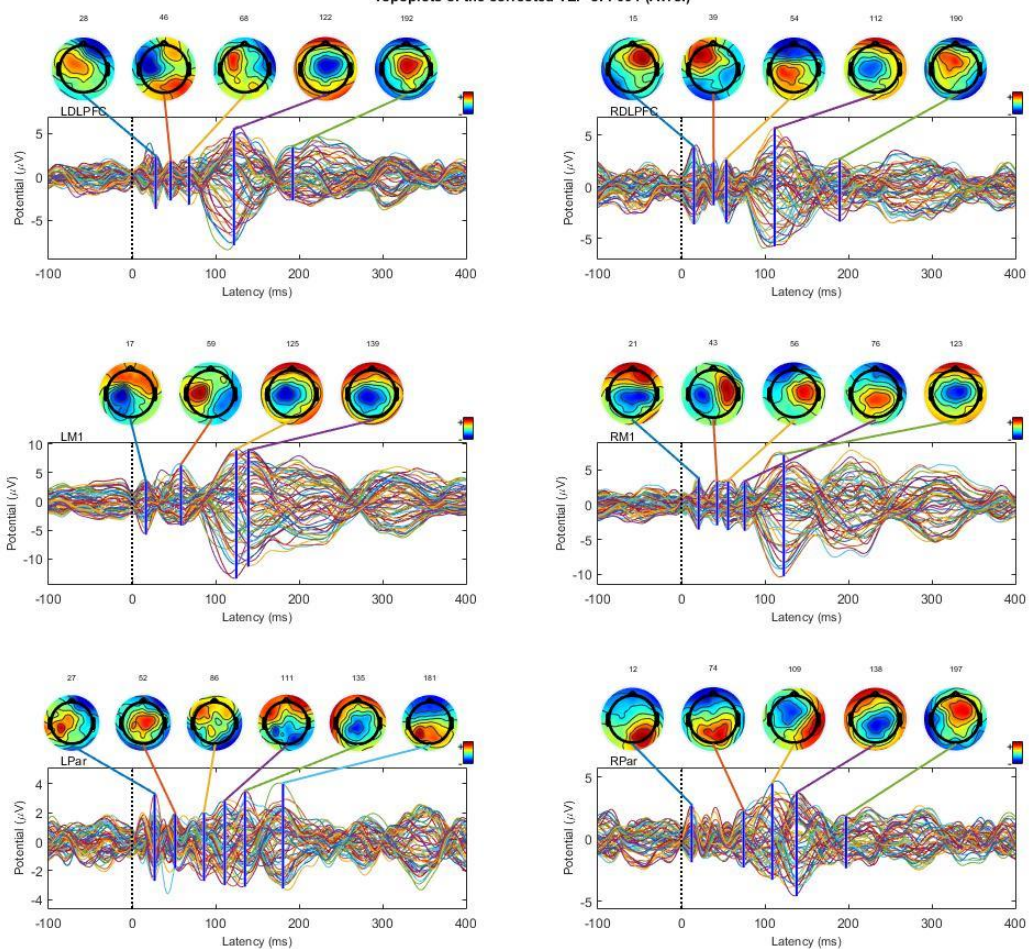

Topoplots of the corrected TEP of P002 (Avref)

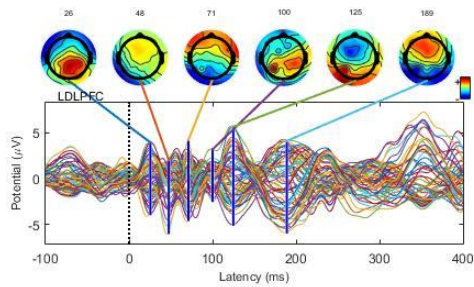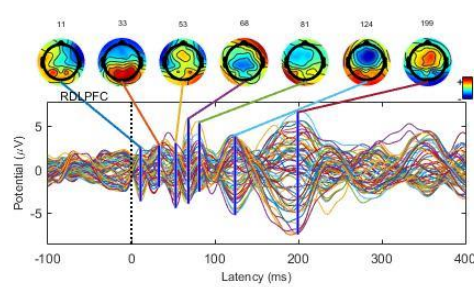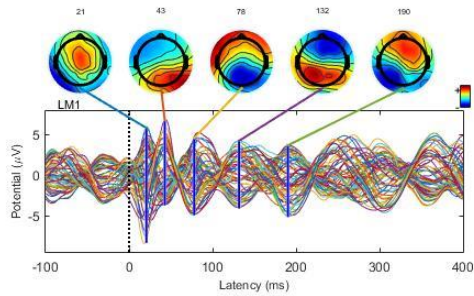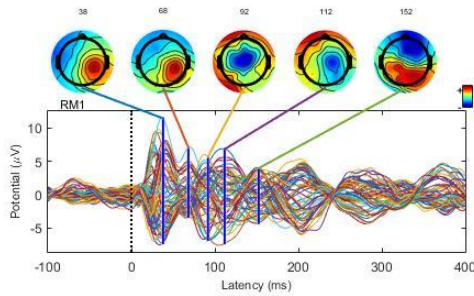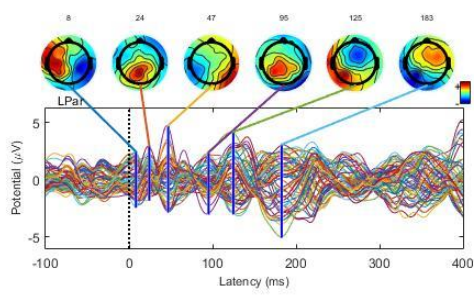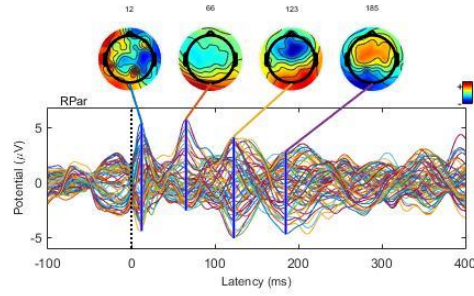

Topoplots of the corrected TEP of P004 (Avref)

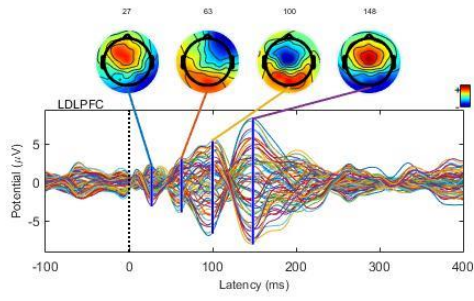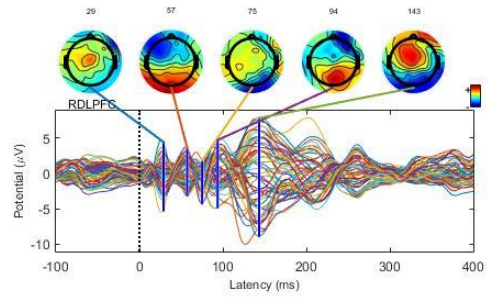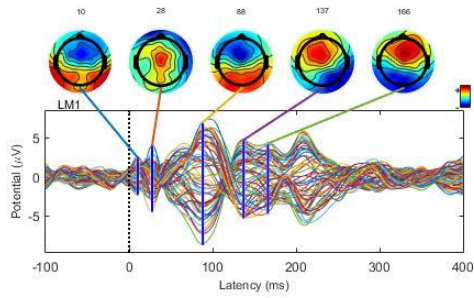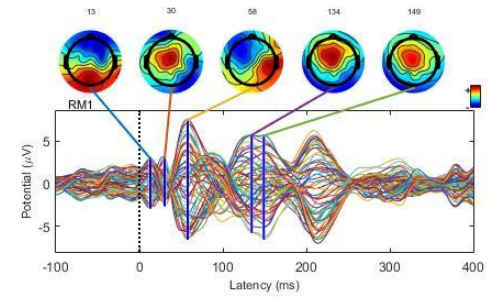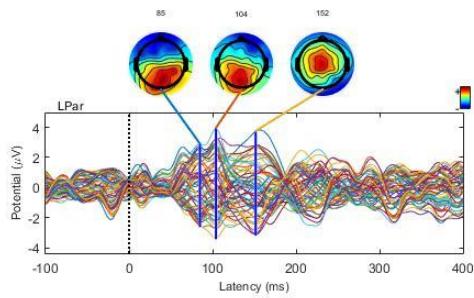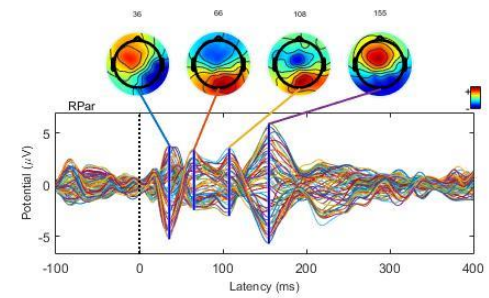

Topoplots of the corrected TEP of P005 (Avref)

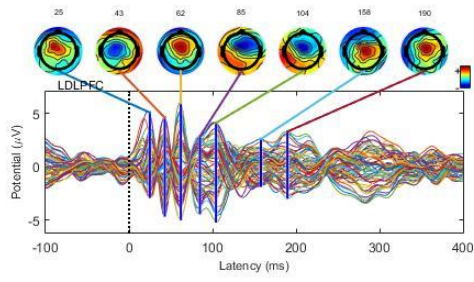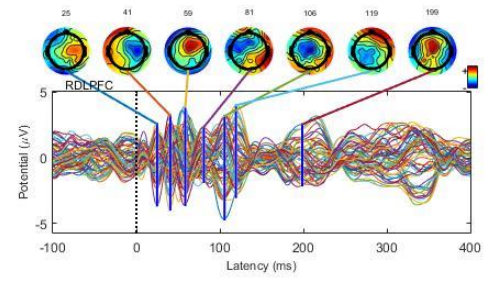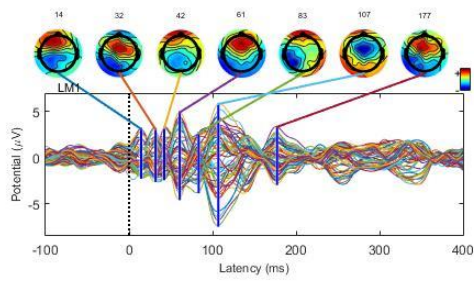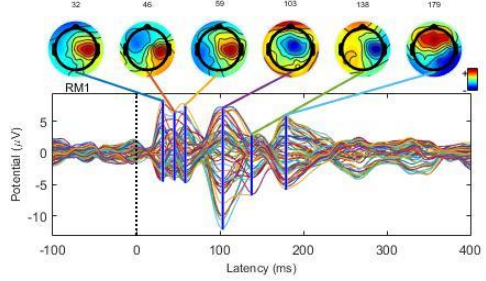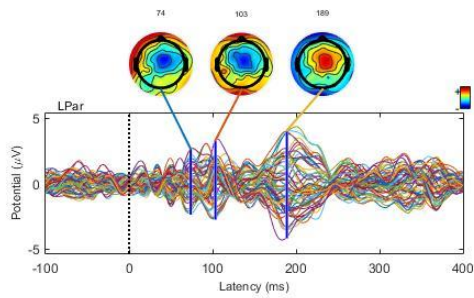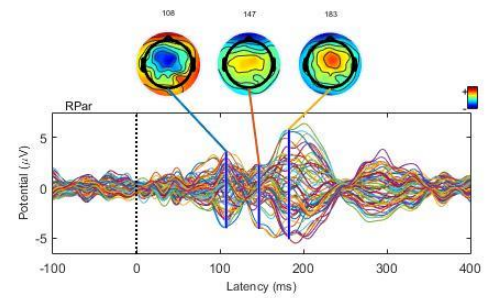



Topoplots of the corrected TEP of P006 (Avref)

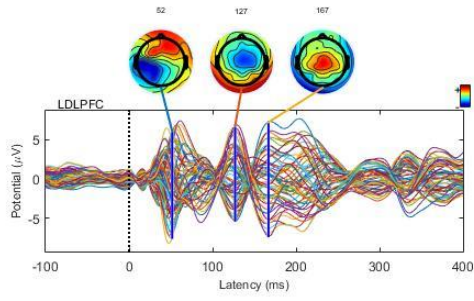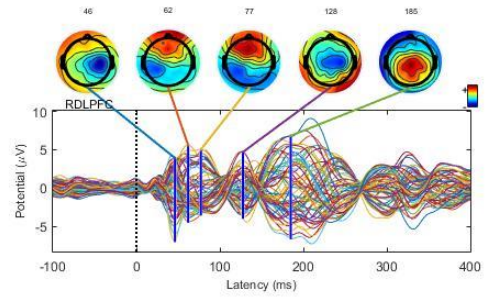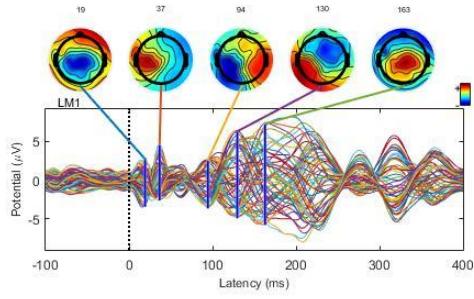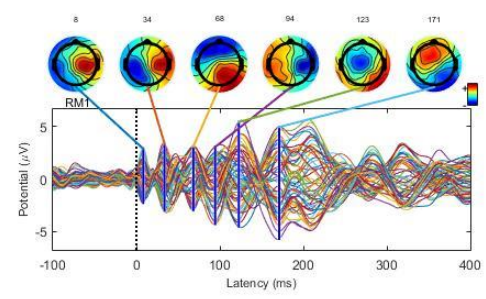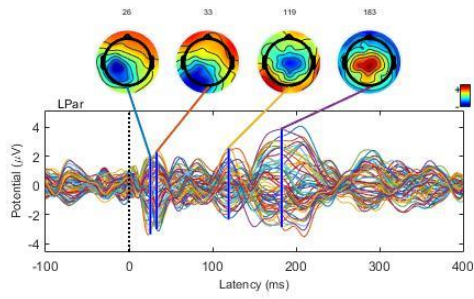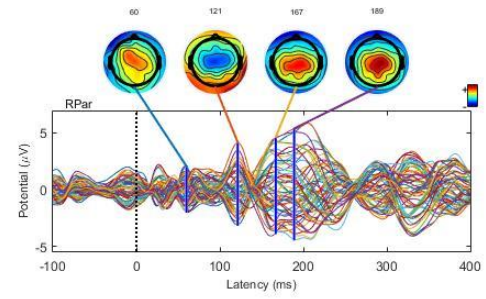

Topoplots of the corrected TEP of P007 (Avref)

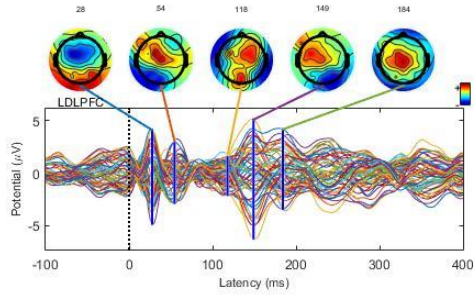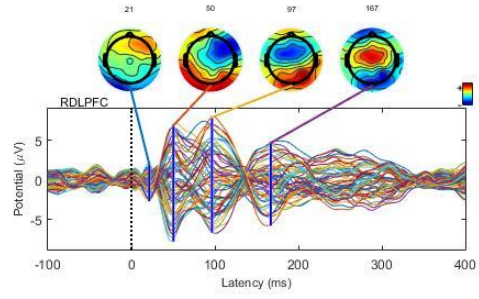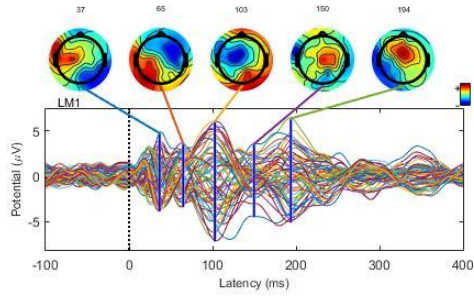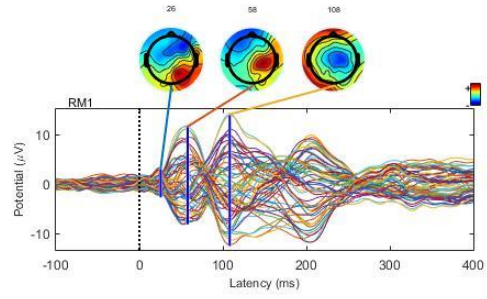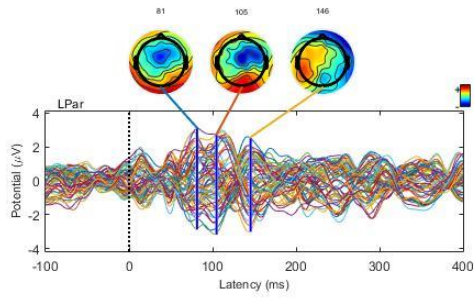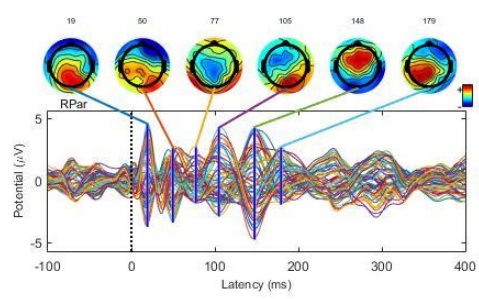

Topoplots of the corrected TEP of P008 (Avref)

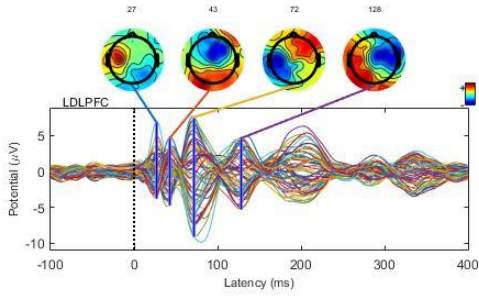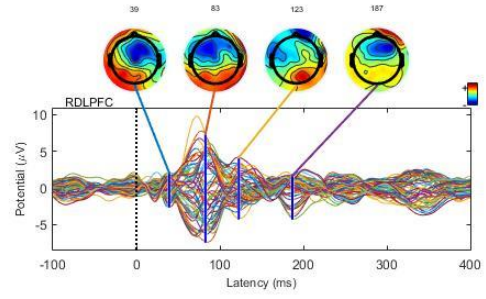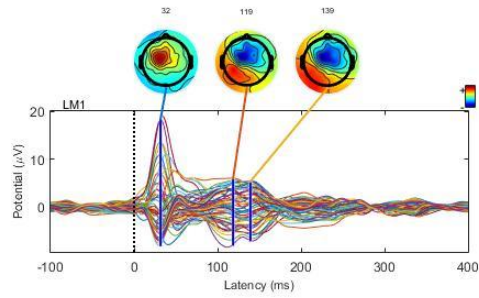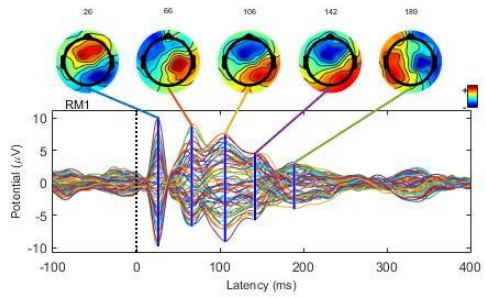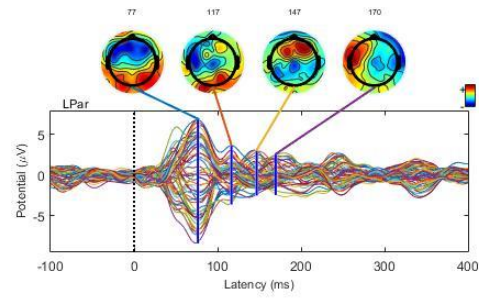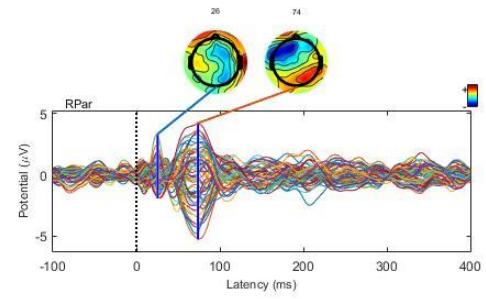

Topoplots of the corrected TEP of P009 (Avref)

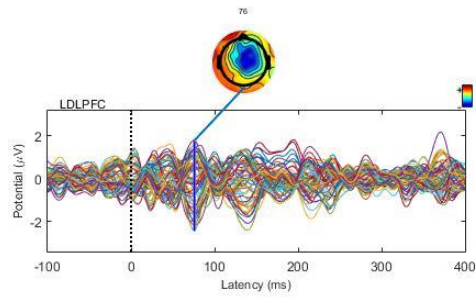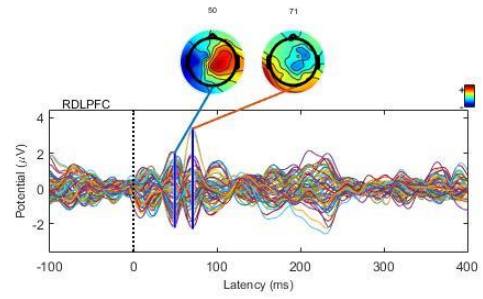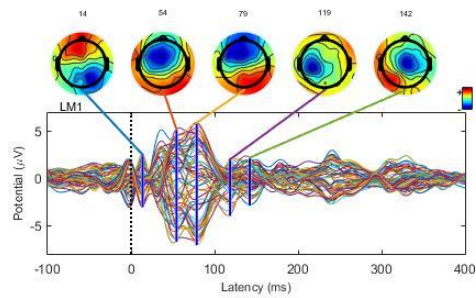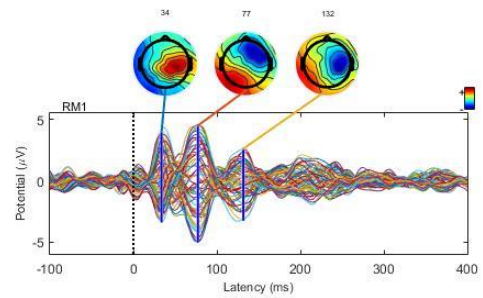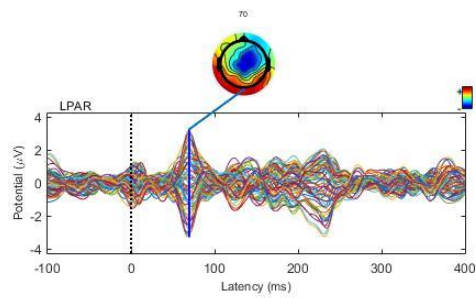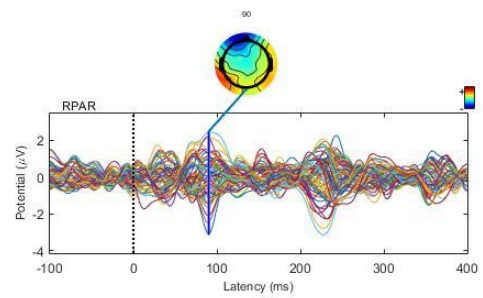



Topoplots of the corrected TEP of P010 (Avref)

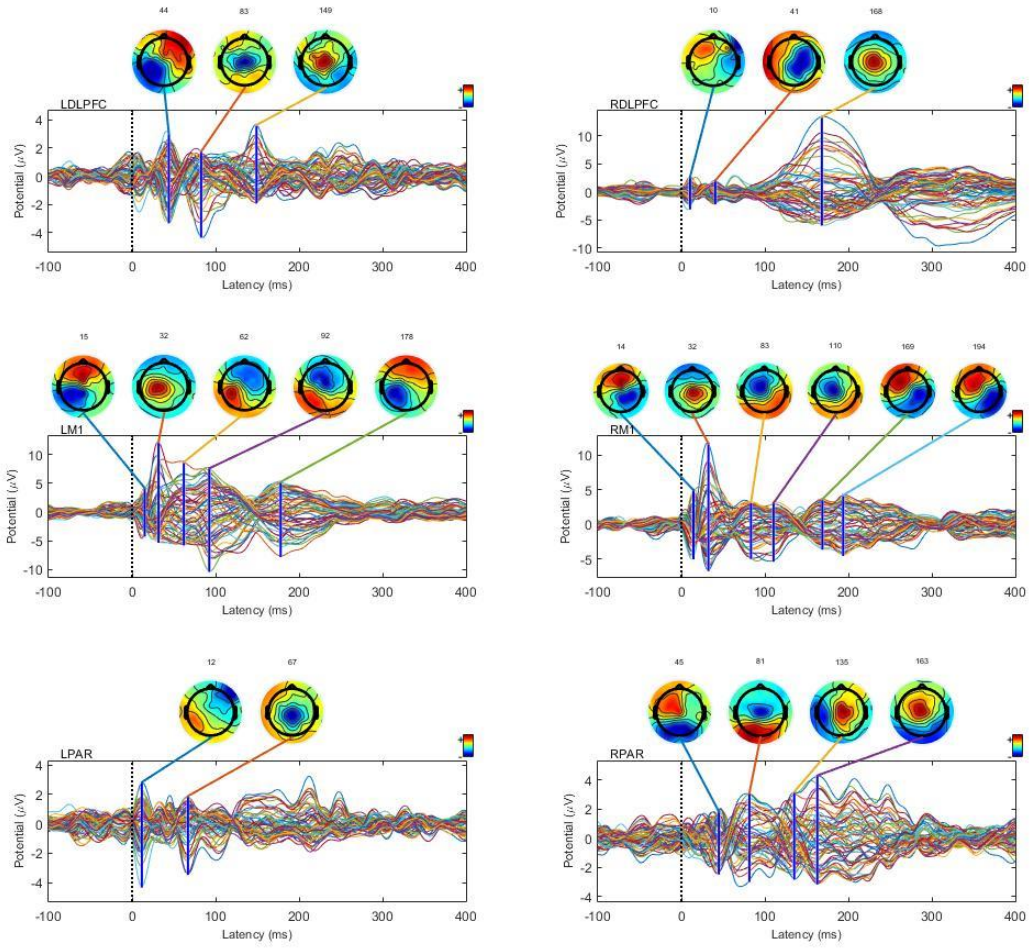

Topoplots of the corrected TEP of P011 (Avref)

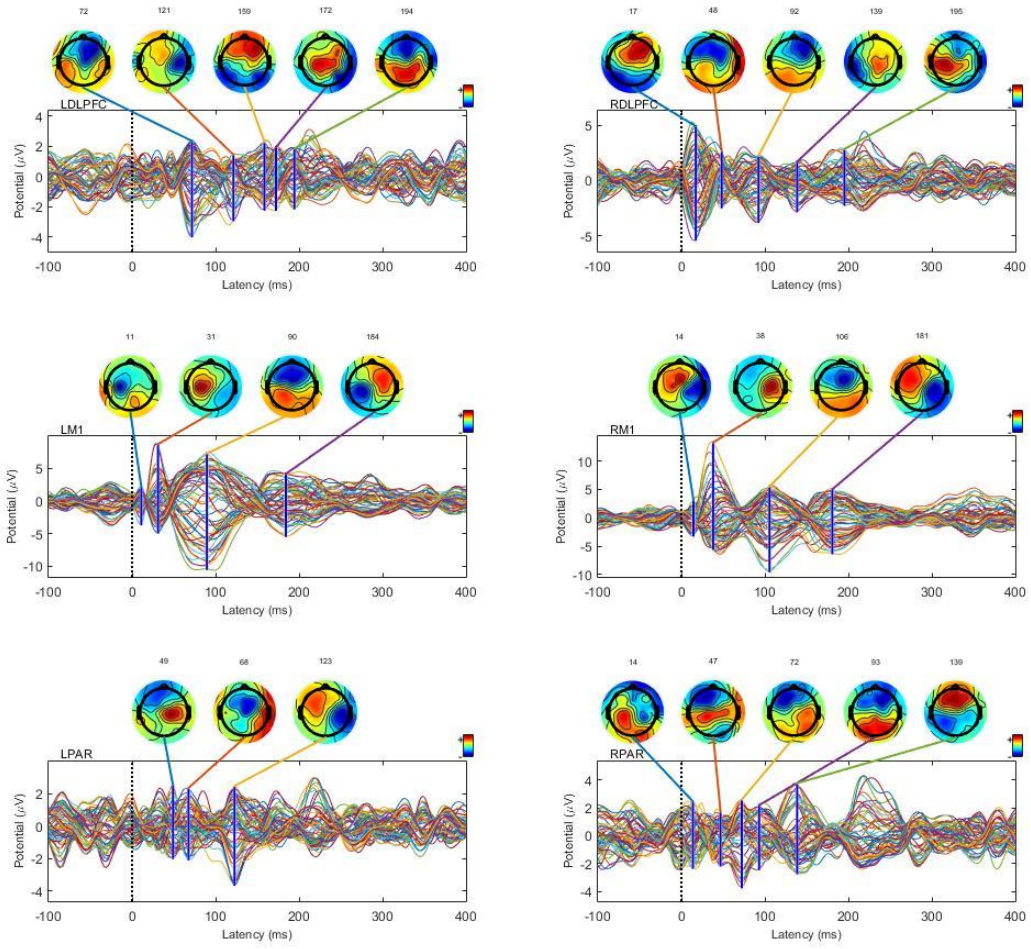

Supplement: NIHMS1565710-supplement-Online_Resource_1.pdf [file NIHMS1565710-supplement-Online_Resource_1.pdf]
