# Supplementary material
Source: PubMed Central journal article supplement (PMC7191224)

**broadband ICC vs 15-75ms TEP at the sensor level**

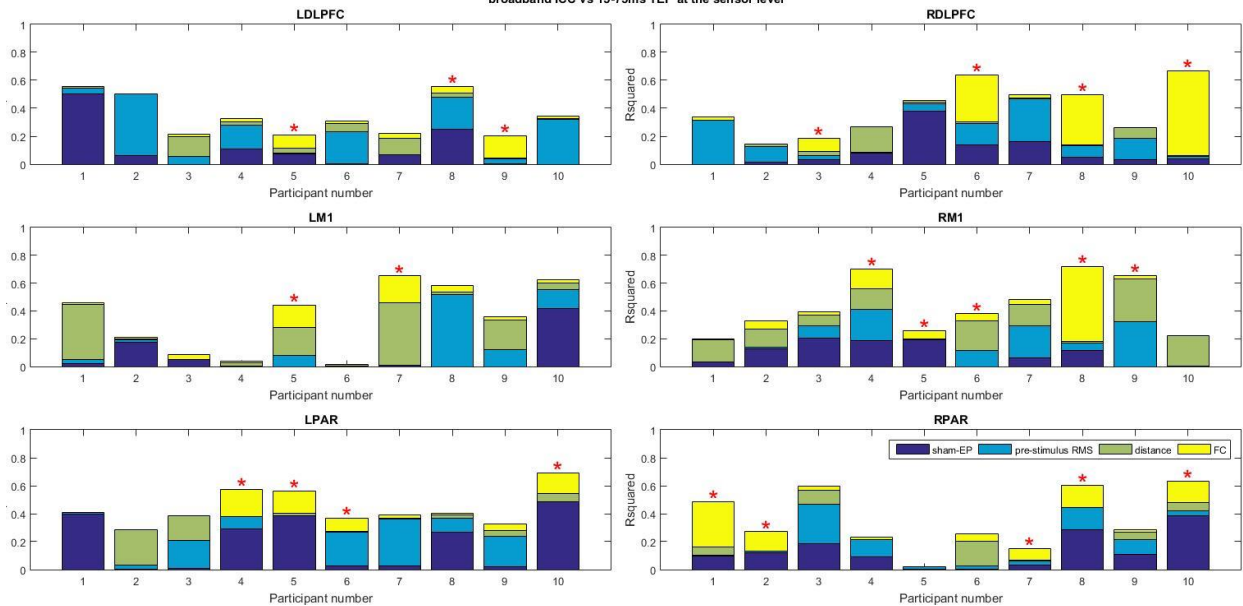

**broadband ICC vs 15-75ms TEP at the source level**

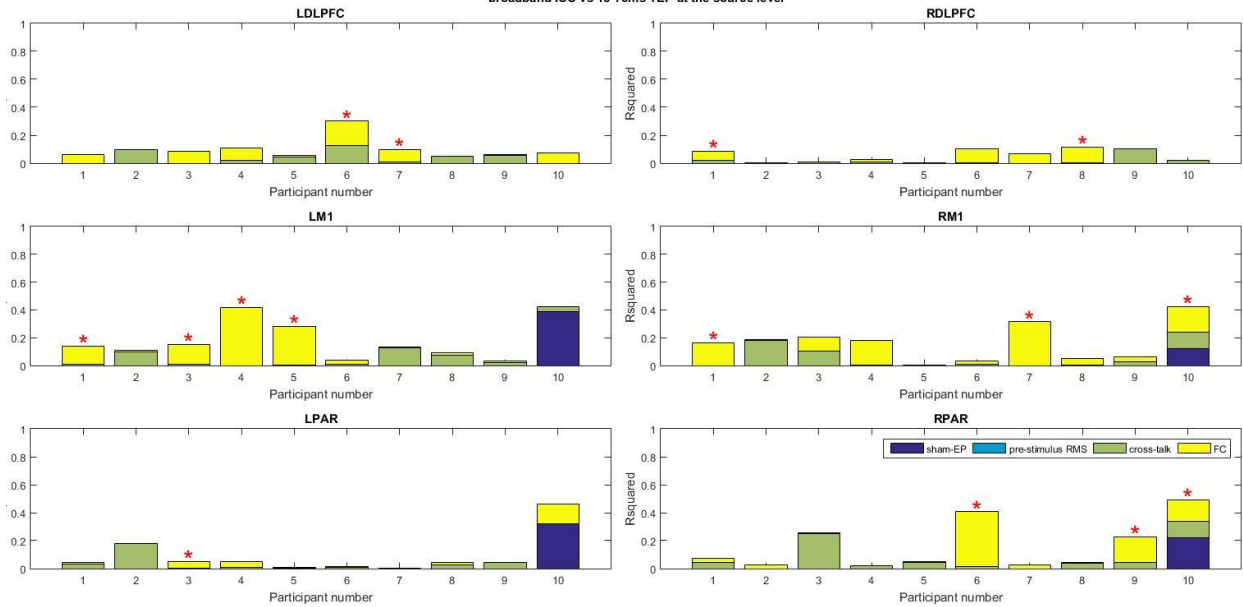

broadband ICC vs 15-400ms TEP at the sensor level

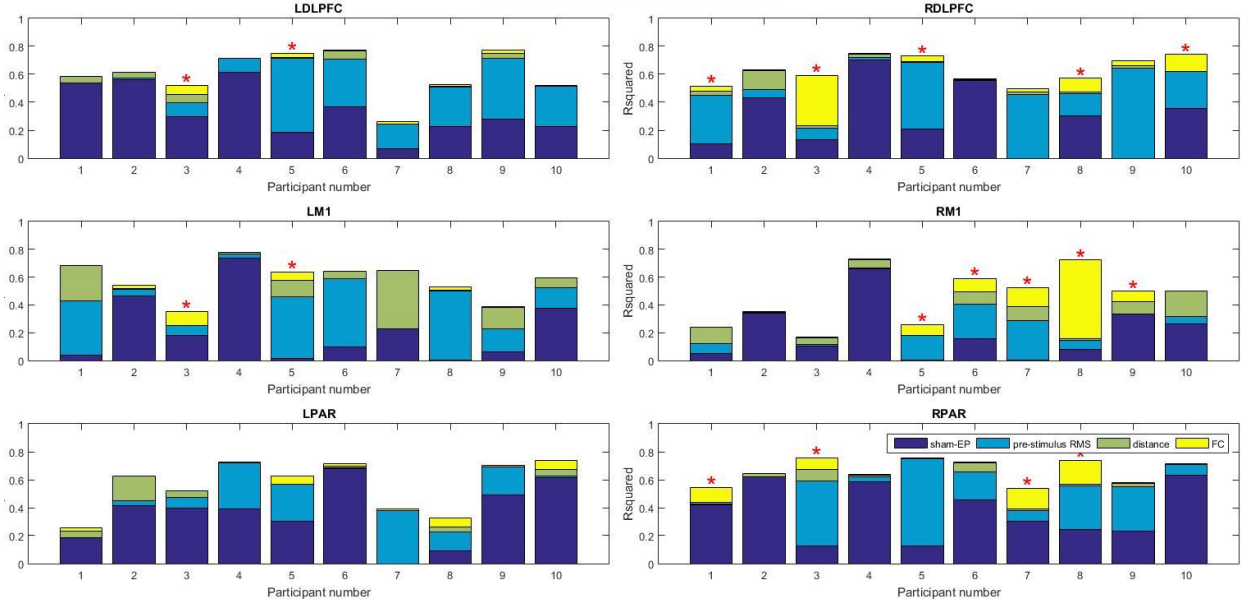

broadband ICC vs 15-400ms TEP at the source level

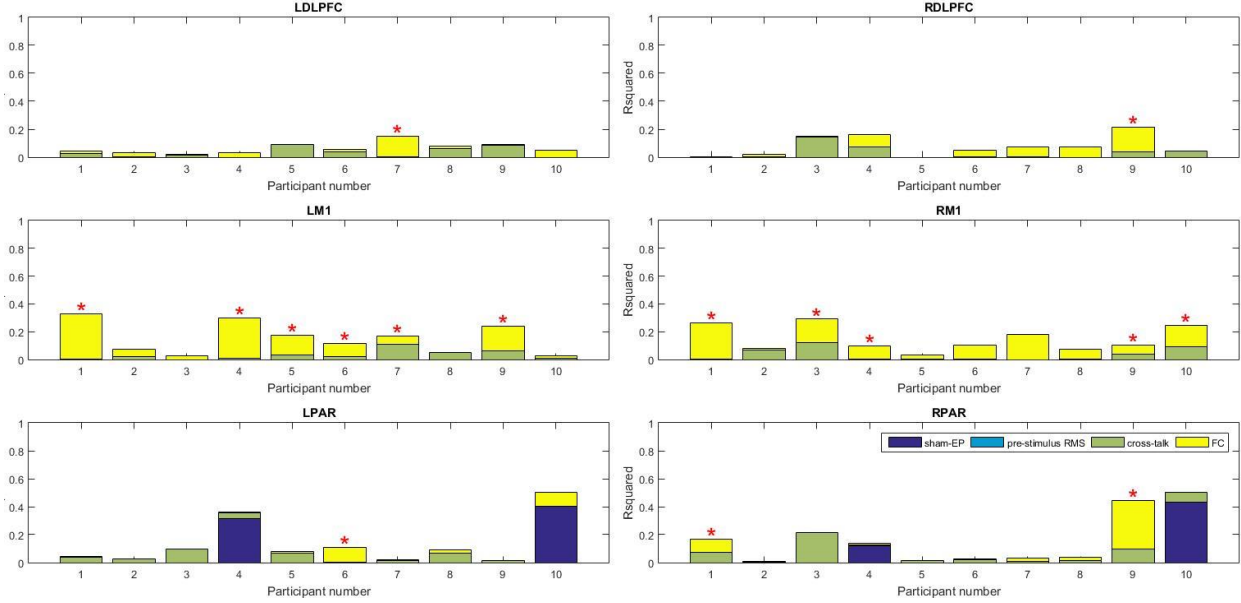

**broadband MI vs 15-75ms TEP at the sensor level**

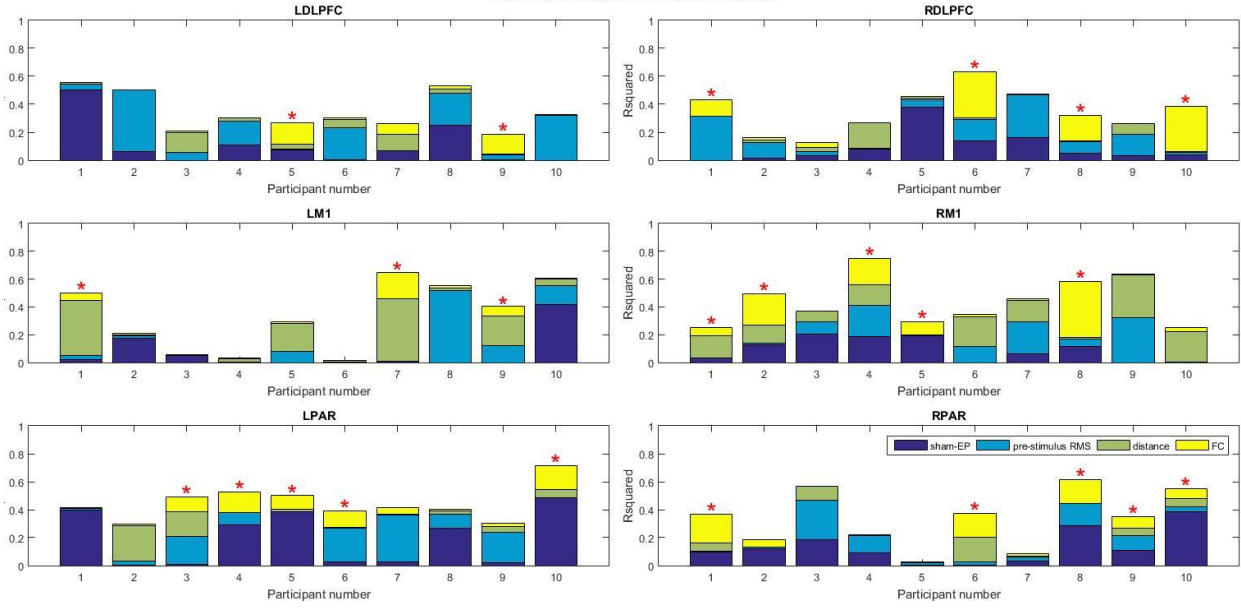

**broadband MI vs 15-75ms TEP at the source level**

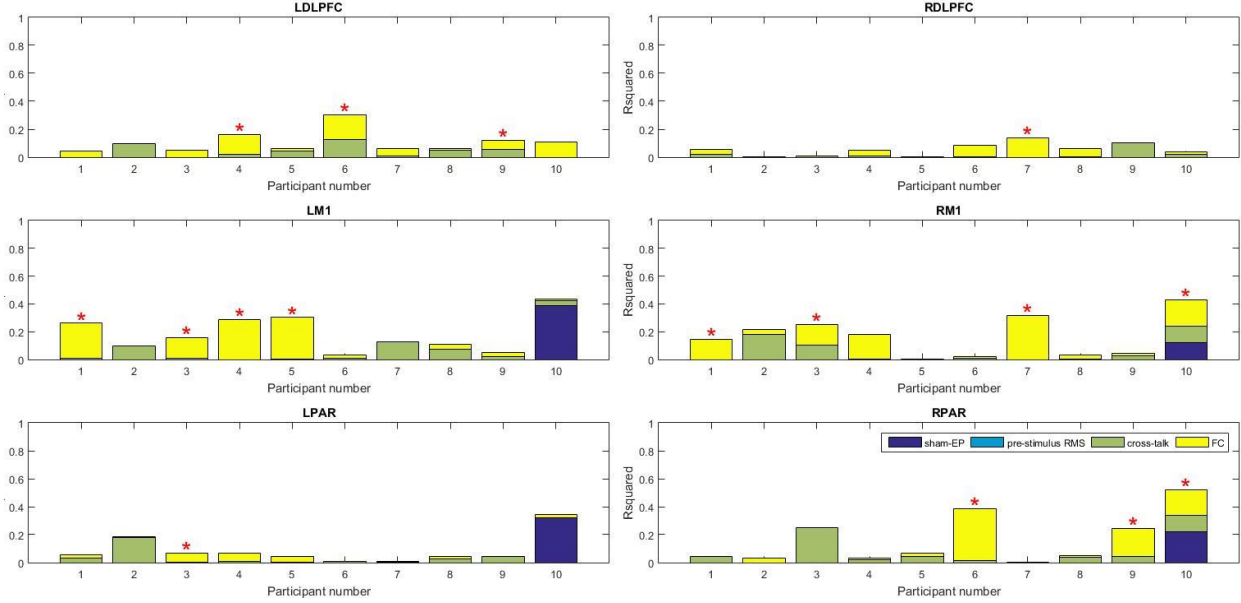

**broadband MI vs 15-400ms TEP at the sensor level**

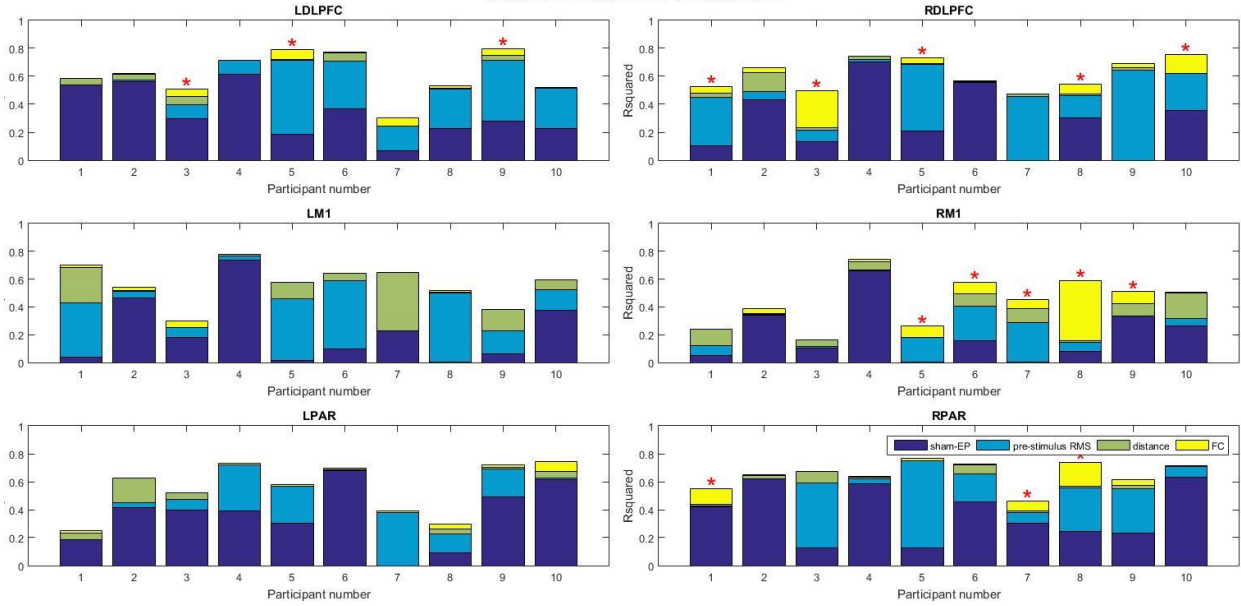

**broadband MI vs 15-400ms TEP at the source level**

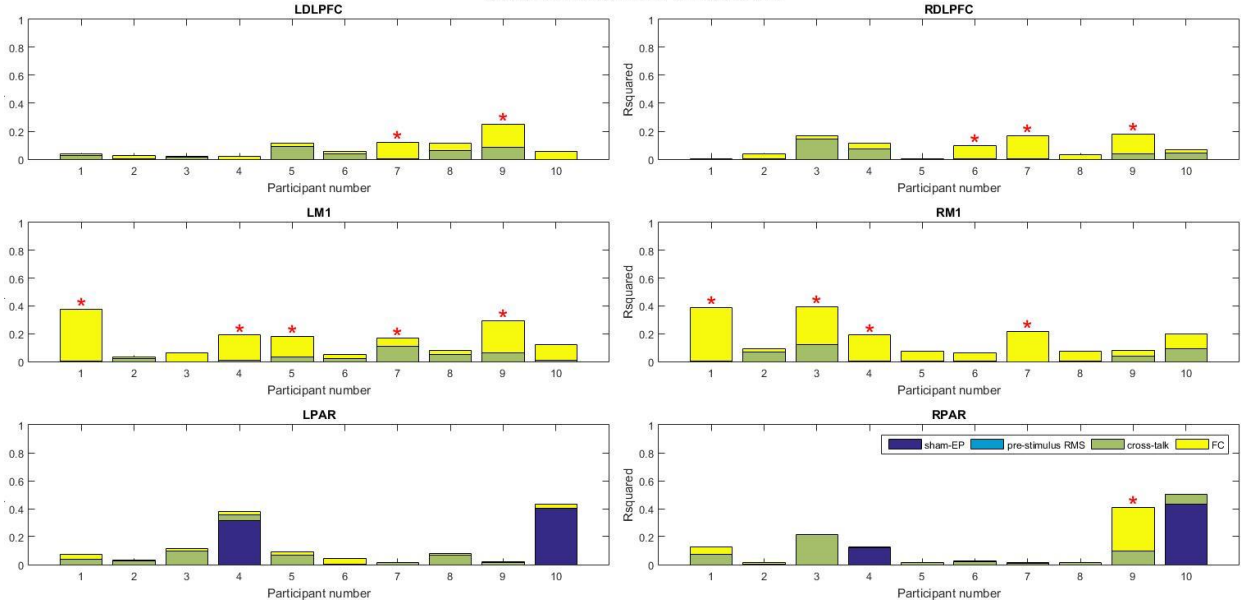

broadband PLV vs 15-75ms TEP at the sensor level

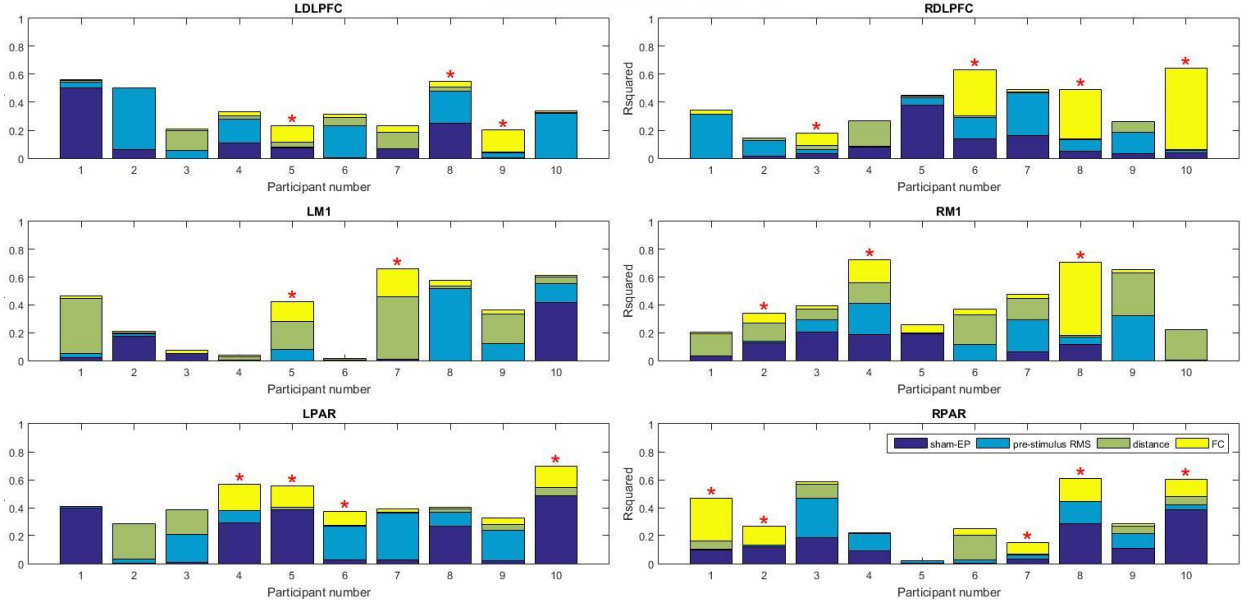

broadband PLV vs 15-75ms TEP at the source level

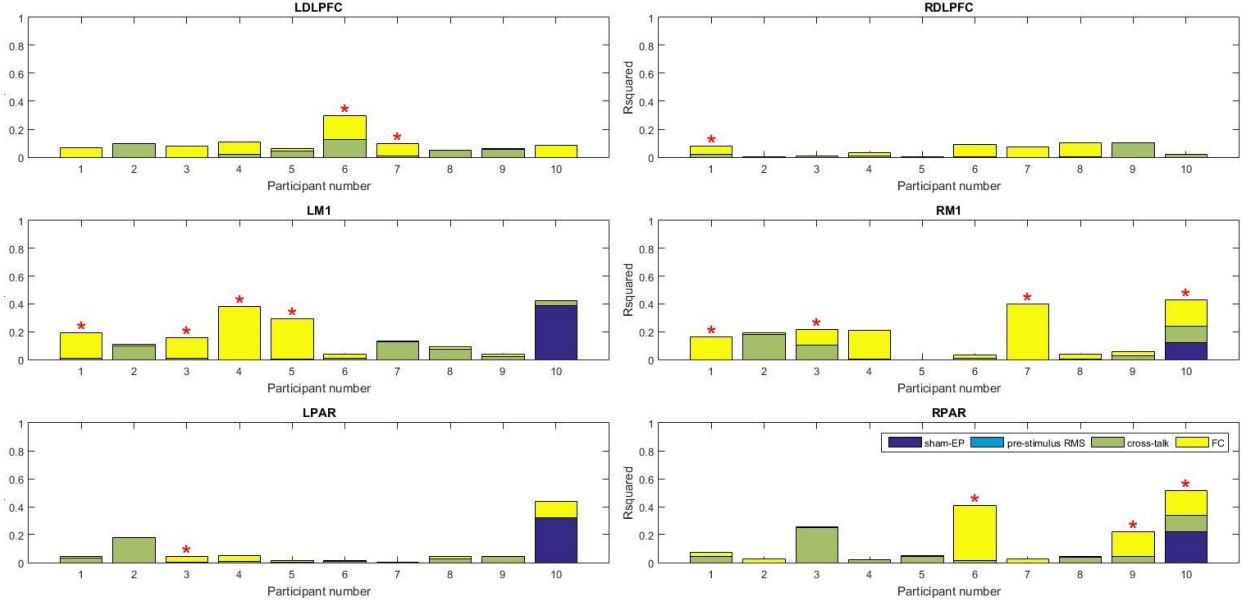

broadband PLV vs 15-400ms TEP at the sensor level

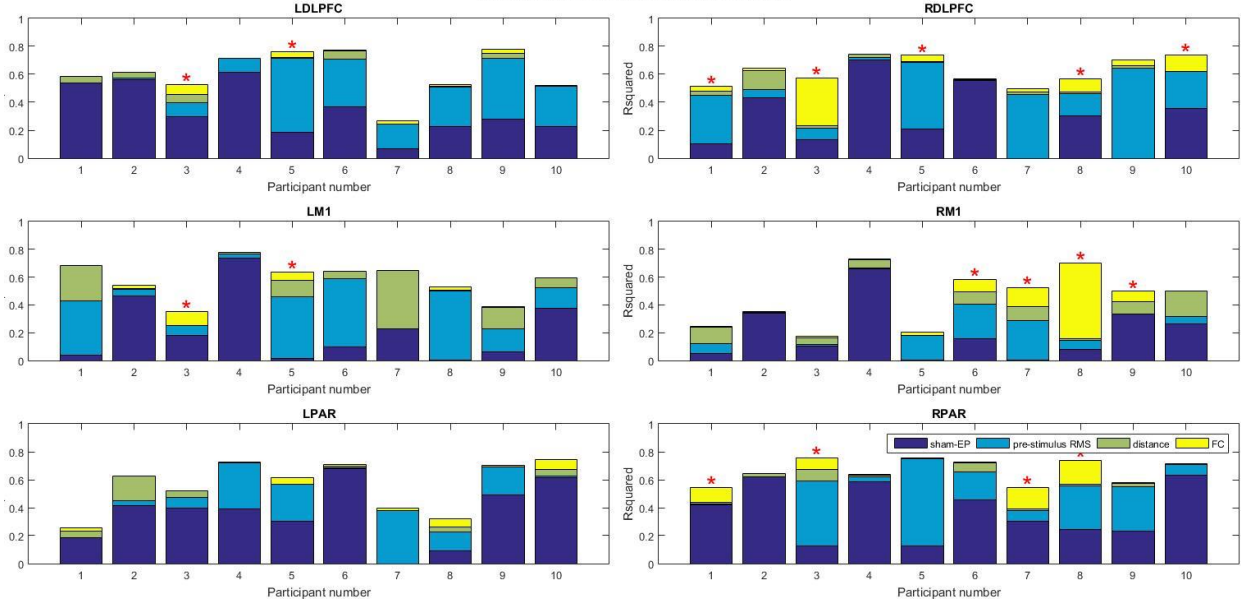

broadband PLV vs 15-400ms TEP at the source level

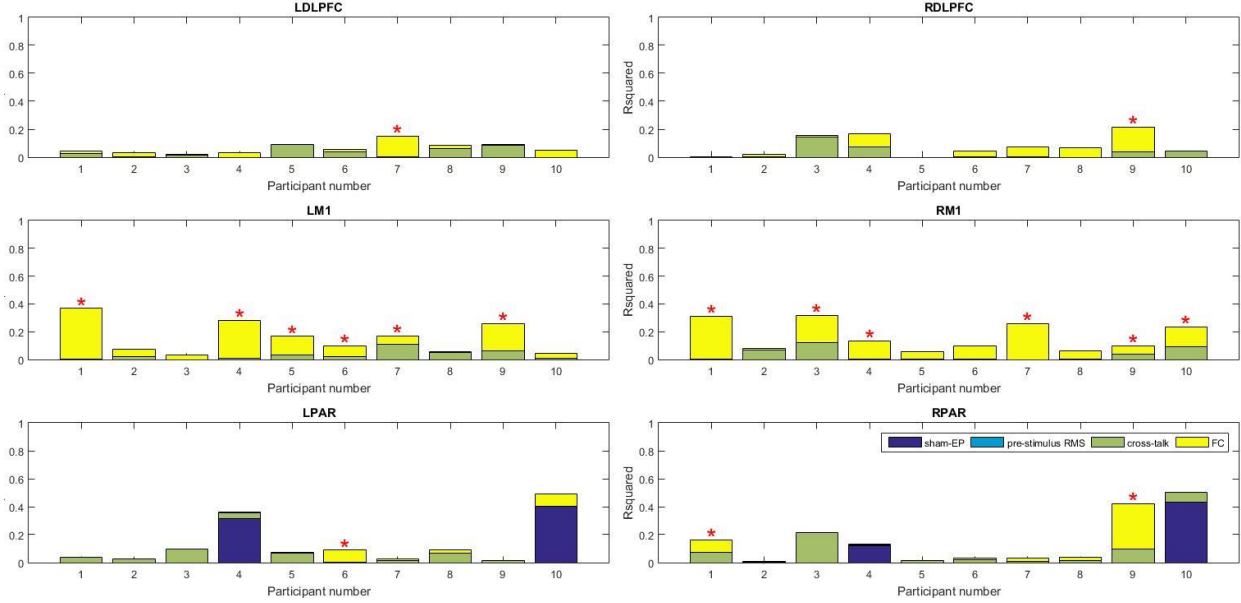

**broadband R vs 15-75ms TEP at the sensor level**

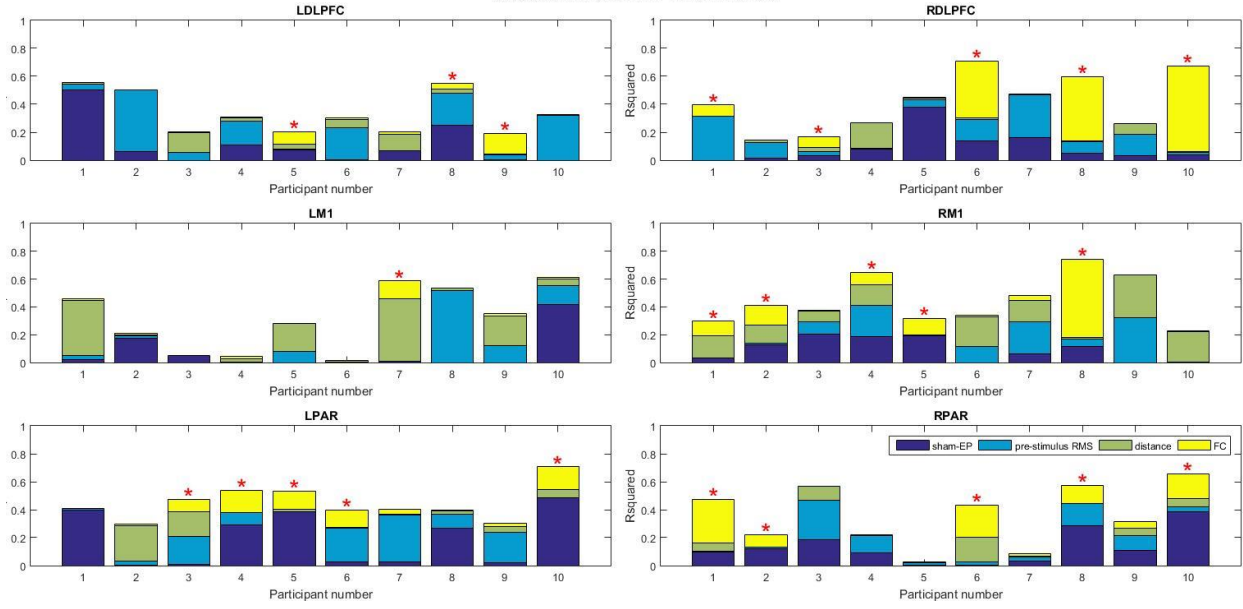

**broadband R vs 15-75ms TEP at the source level**

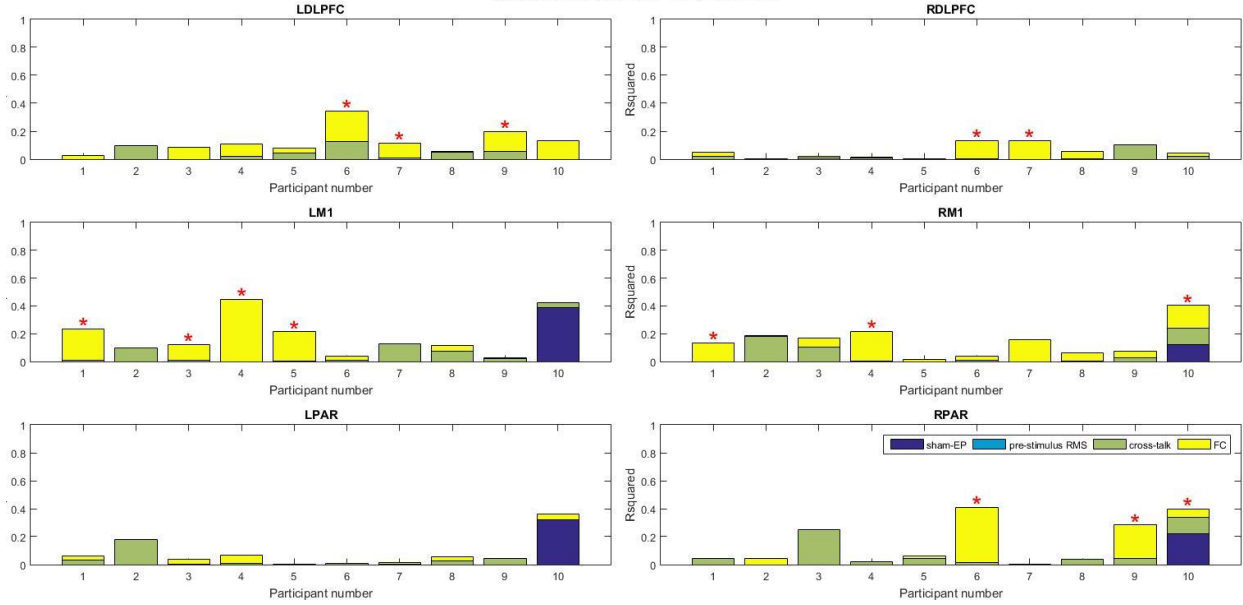

**broadband R vs 15-400ms TEP at the sensor level**

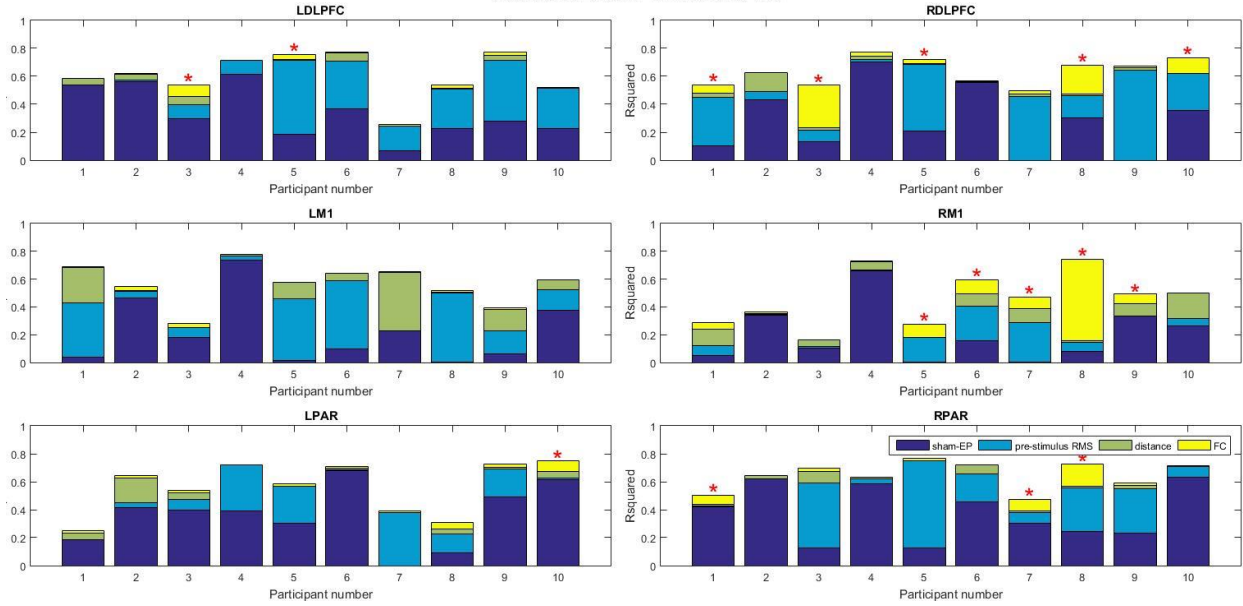

**broadband R vs 15-400ms TEP at the source level**

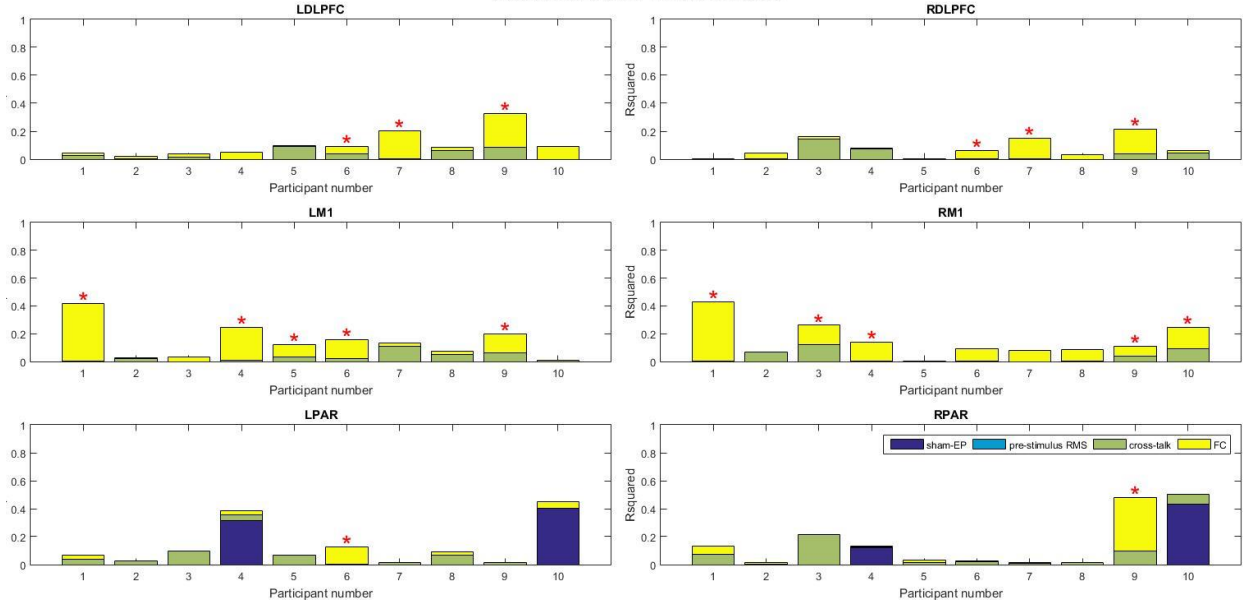



broadband wPLI vs 15-75ms TEP at the sensor level

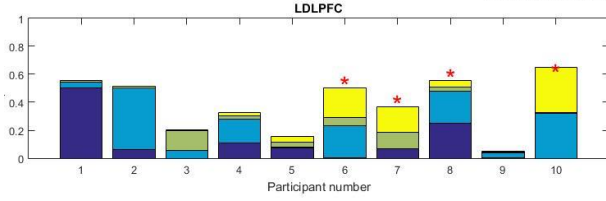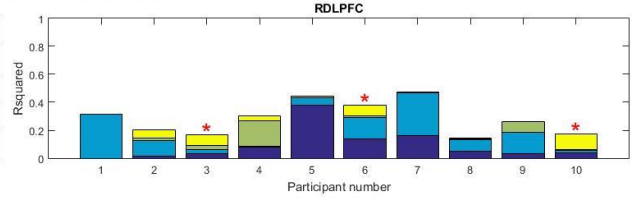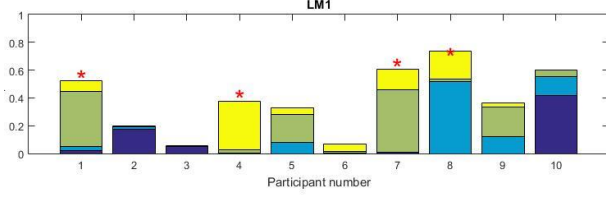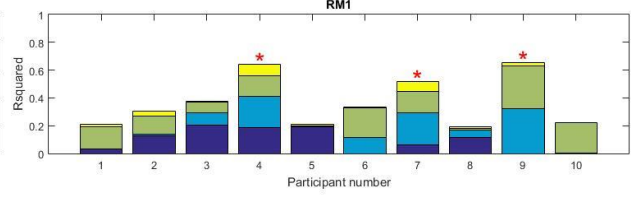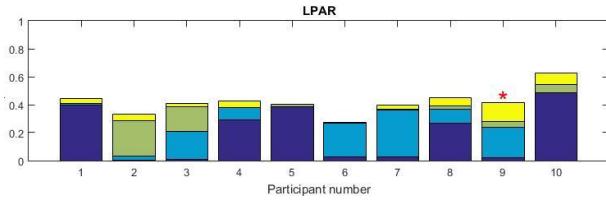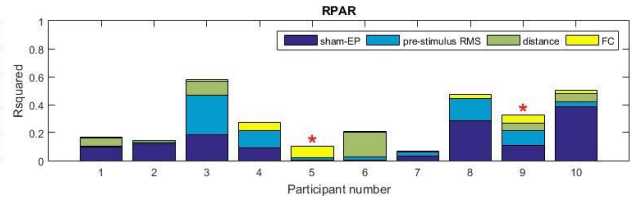

broadband wPLI vs 15-75ms TEP at the source level

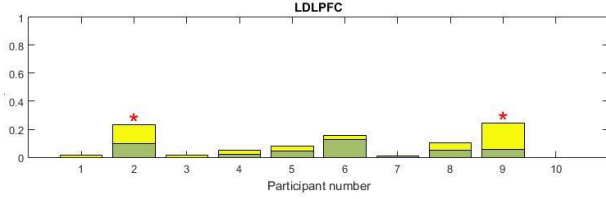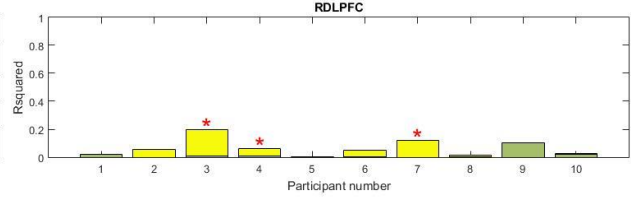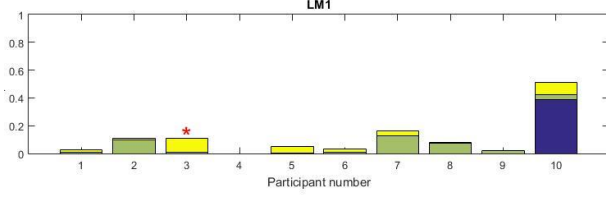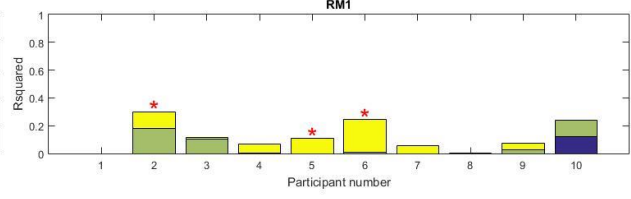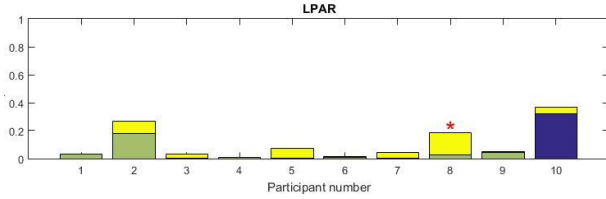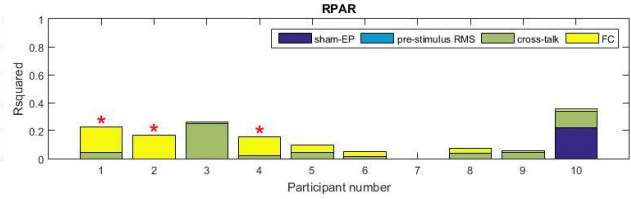

broadband wPLI vs 15-400ms TEP at the sensor level

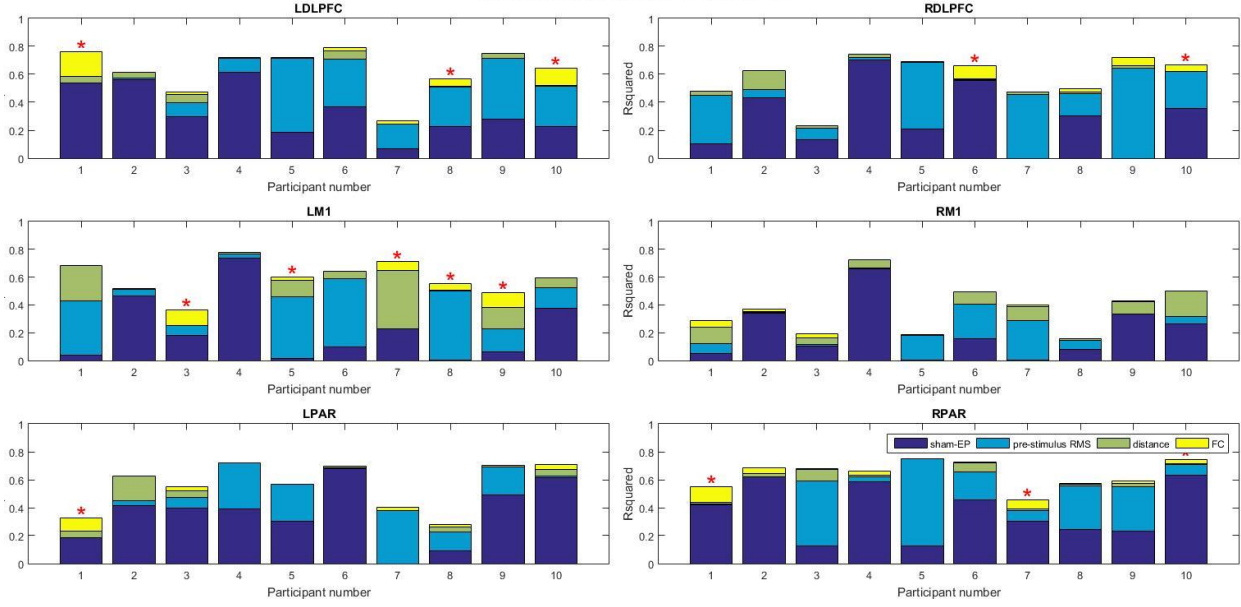

broadband wPLI vs 15-400ms TEP at the source level

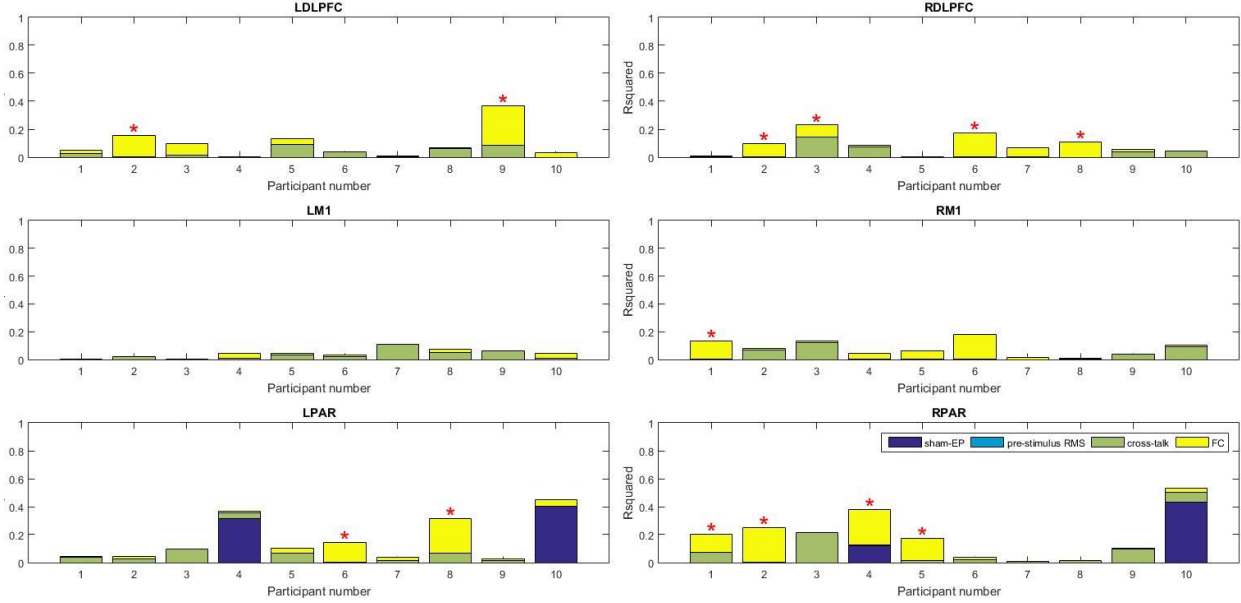

Supplement: NIHMS1565710-supplement-Online_Resource_7.pdf [file NIHMS1565710-supplement-Online_Resource_7.pdf]
