# Supplementary material
Source: PubMed Central journal article supplement (PMC7191224)
Supplement: NIHMS1565710-supplement-Online_Resource_6.pdf [file NIHMS1565710-supplement-Online_Resource_6.pdf]

Supplementary material: Table of Desikan-Killiany atlas parcels which were used for source space analysis

|    |                        |    |                        |
|----|------------------------|----|------------------------|
| 1  | bankssts L             | 23 | parstriangularis L     |
| 2  | bankssts R             | 24 | parstriangularis R     |
| 3  | caudalmiddlefrontal L  | 25 | postcentral L          |
| 4  | caudalmiddlefrontal R  | 26 | postcentral R          |
| 5  | frontalpole L          | 27 | precentral L           |
| 6  | frontalpole R          | 28 | precentral R           |
| 7  | fusiform L             | 29 | rostralmiddlefrontal L |
| 8  | fusiform R             | 30 | rostralmiddlefrontal R |
| 9  | inferiorparietal L     | 31 | superiorfrontal L      |
| 10 | inferiorparietal R     | 32 | superiorfrontal R      |
| 11 | inferiortemporal L     | 33 | superiorparietal L     |
| 12 | inferiortemporal R     | 34 | superiorparietal R     |
| 13 | lateraloccipital L     | 35 | superiortemporal L     |
| 14 | lateraloccipital R     | 36 | superiortemporal R     |
| 15 | lateralorbitofrontal L | 37 | supramarginal L        |
| 16 | lateralorbitofrontal R | 38 | supramarginal R        |
| 17 | middletemporal L       | 39 | temporalpole L         |
| 18 | middletemporal R       | 40 | temporalpole R         |
| 19 | parsopercularis L      | 41 | transversetemporal L   |
| 20 | parsopercularis R      | 42 | transversetemporal R   |
| 21 | parsorbitalis L        |    |                        |
| 22 | parsorbitalis R        |    |                        |
