# Supplementary material
Source: PubMed Central journal article supplement (PMC7191224)

Topoplots of the sham-EP (Avref)

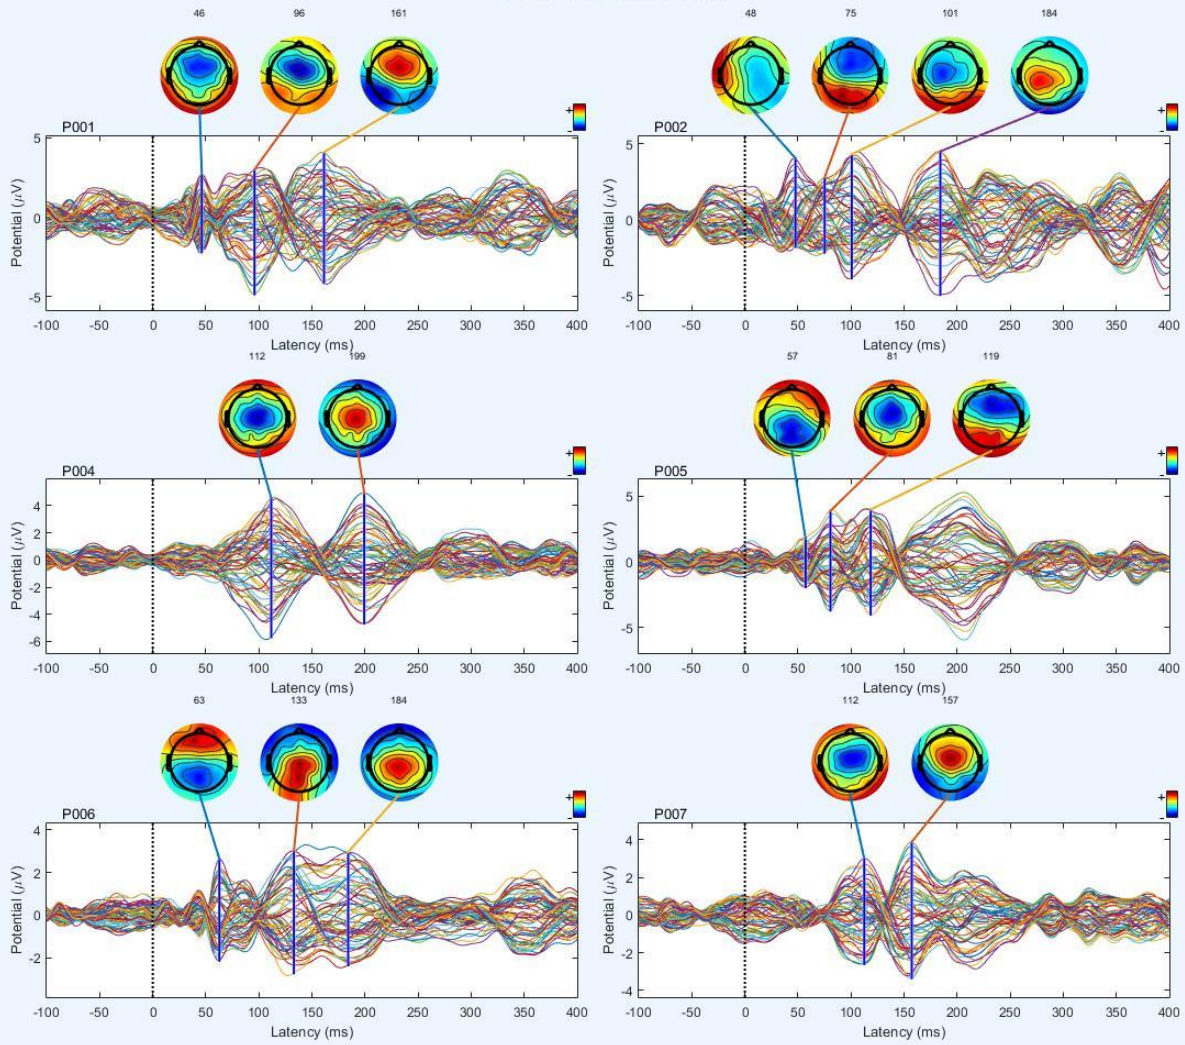

Topoplots of the sham-EP (Avref)

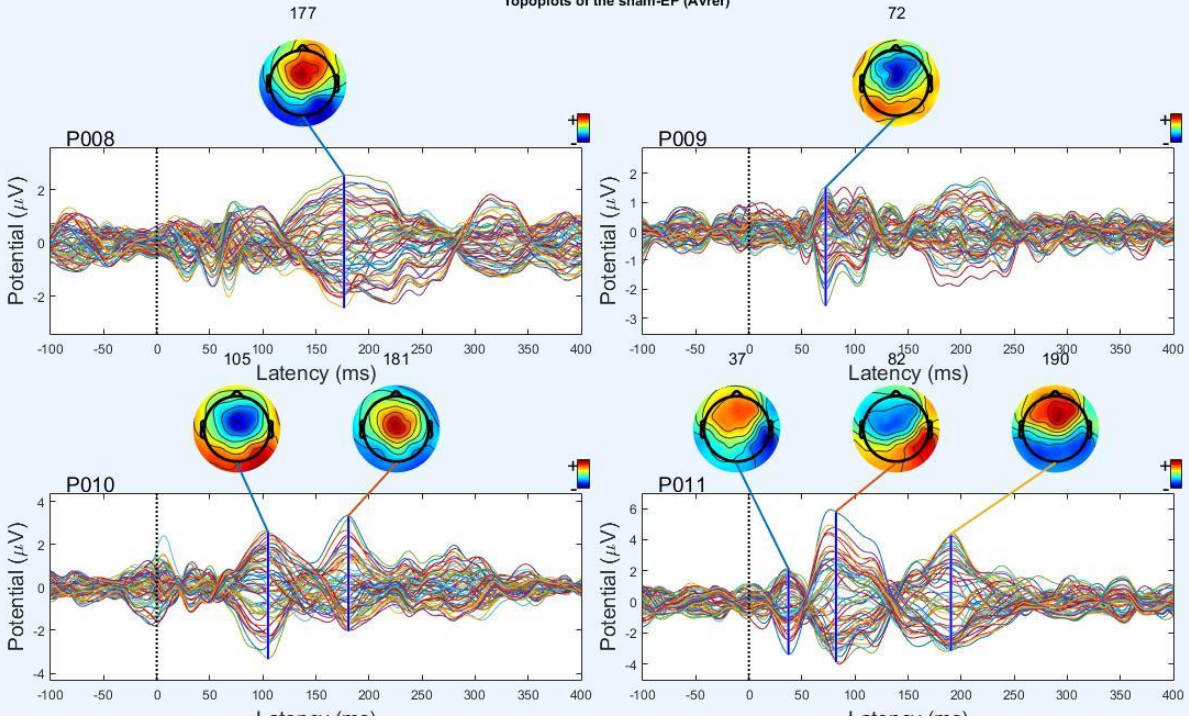

Supplement: NIHMS1565710-supplement-Online_Resource_2.pdf [file NIHMS1565710-supplement-Online_Resource_2.pdf]

FC vs 15-75ms TEPs by frequency band

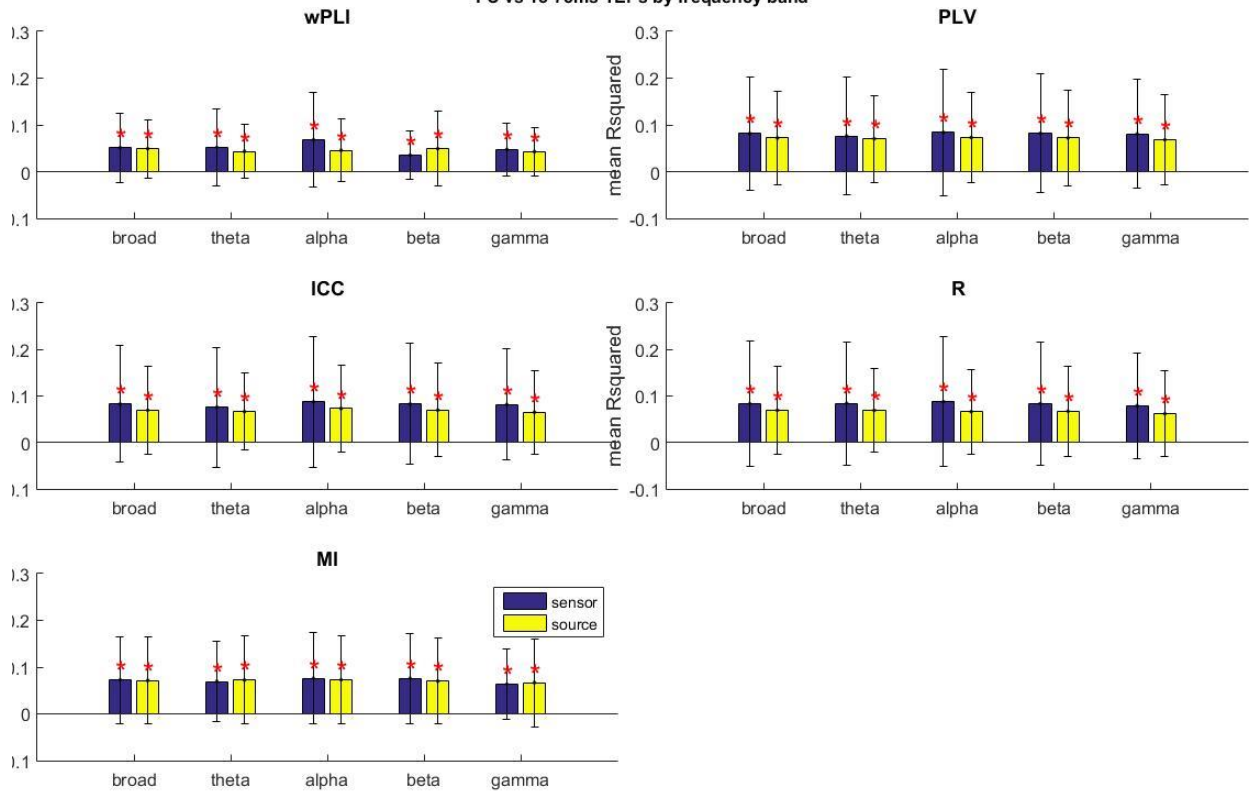

FC vs 15-400ms TEPs by frequency band

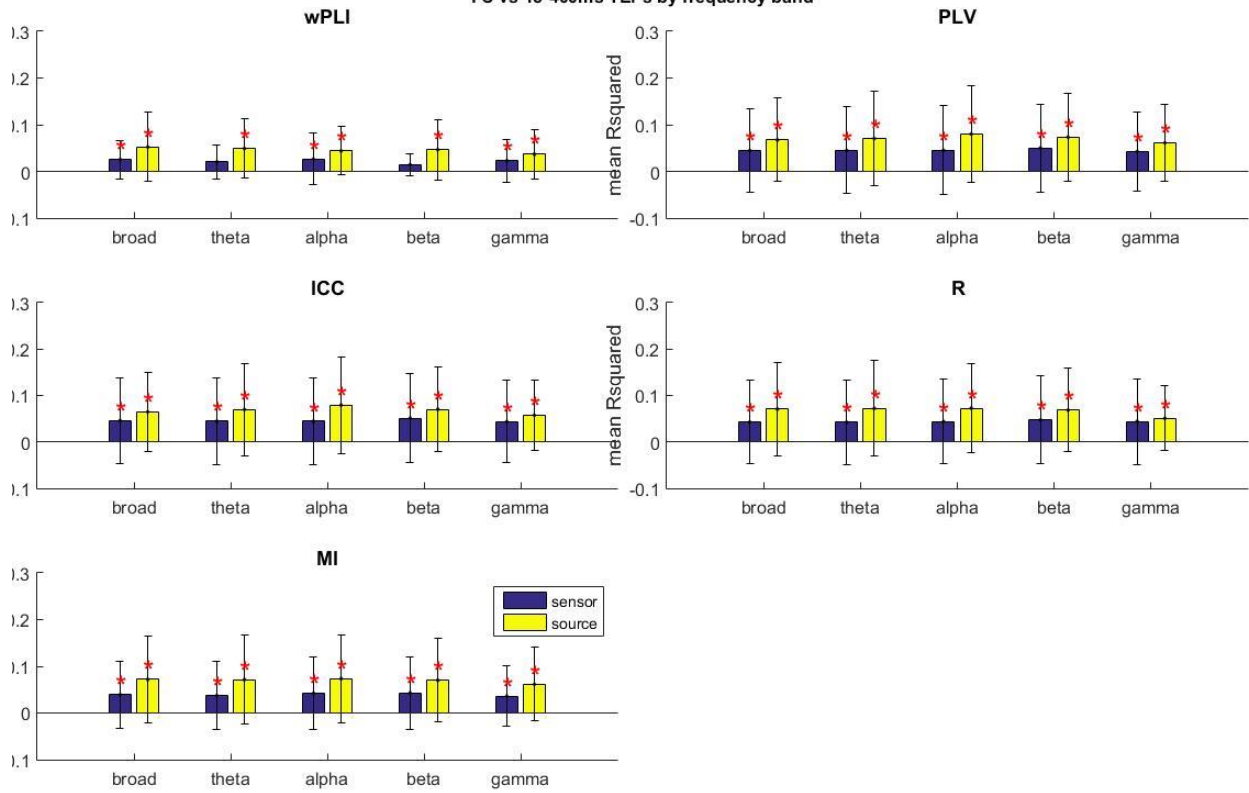

Supplement: NIHMS1565710-supplement-Online_Resource_8.pdf [file NIHMS1565710-supplement-Online_Resource_8.pdf]
